# Supplementary material
Source: publisher site journal article supplement (https://www.dovepress.com/article/482471)
Supplement: Supplementary file 1 [file get_supplementary_file.php]

**Supplementary table 1.** The detection details of mNGS or tNGS for the identification of psittacosis pneumonia.

| **Patient** | **Severe cases** | **Sample for NGS** | **NGS method** | Sequence results for C. psittaci | | | | **Sequence results for other species** | | | | |
| --- | --- | --- | --- | --- | --- | --- | --- | --- | --- | --- | --- | --- |
| **Sequence counts** | **Reads per million** | **Relative abundance** | **Concentration (copies/mL)** | **Other pathogens** | **Sequence counts** | **Reads per million** | **Relative abundance** | **Concentration (copies/mL)** |
| 1 | No | BALF | mNGS | 88 | 4.67 | 34.11% |  | Streptococcus pneumoniae | 1 | 0.053118277 | 0.39% |  |
| Staphylococcus aureus | 1 | 0.053118277 | 0.39% |  |
| 2 | Yes | BALF | mNGS | 505 |  |  |  | / |  |  |  |  |
| 3 | No | BALF | mNGS | 10 | 3.17 | 0.02% |  | / |  |  |  |  |
| 4 | No | BALF | mNGS | 37 |  |  |  | / |  |  |  |  |
| 5 | No | BALF | mNGS | 132 |  |  |  | / |  |  |  |  |
| 6 | No | BALF | mNGS | 32 |  |  |  | / |  |  |  |  |
| 7 | No | BALF | tNGS | 64 |  |  | <1.0E+4 | / |  |  |  |  |
| 8 | No | BALF | mNGS | 1735 | 67.88 | 1.67% |  | Enterococcus faecalis | 14001 | 547.77 | 0.20% |  |
| 9 | No | BALF | tNGS | 92 |  |  | 1.40E+04 | / |  |  |  |  |
| 10 | No | BALF | mNGS | 47881 | 3177 | 42.40% |  | / |  |  |  |  |
| 11 | No | BALF | mNGS | 17 |  |  |  | / |  |  |  |  |
| 12 | No | BALF | mNGS | 7 | 106.38 | 0.01% |  | Human gammaherpesvirus 4 | 16 | 243 | 0.02% |  |
| 13 | No | BALF | mNGS | 6009 |  |  |  | Aspergillus flavus | 113 |  |  |  |
| Aspergillus fumigatus | 55 |  |  |  |
| 14 | No | BALF | tNGS | 1066 |  |  | 5883 | Klebsiella pneumoniae | 89 |  |  | 491 |
| Candida albicans | 6567 |  |  | 36242 |
| 15 | No | BALF | mNGS | 271007 | 16931 | 85.40% |  | Corynebacterium accolens | 2 | 9 | 0.04% |  |
| 16 | No | BALF | mNGS | 6131 | 447 | 10.90% |  | / |  |  |  |  |
| 17 | No | BALF | tNGS | 27 |  |  | <1.0E+4 | Pseudomonas aeruginosa | 36 |  |  | <1.0E+4 |
| 18 | No | BALF | tNGS | 51 | 782 |  | 100 | / |  |  |  |  |
| 19 | Yes | BALF | tNGS | 56 | 783 |  | 3182 | Enterococcus faecalis | 11 | 154 |  | 625 |
| 20 | No | BALF | tNGS | 3 | 39 |  | 101 | Stenotrophomonas maltophilia | 2405 | 31370 |  | 80705 |
| 21 | Yes | BALF | tNGS | 2 | 27 |  | 100 | Stenotrophomonas maltophilia | 34 | 467 |  | 253 |
| Staphylococcus aureus | 1 | 14 |  | 100 |
| Aspergillus flavus | 176 | 2418 |  | 1311 |
| Enterococcus faecalis | 234 | 3215 |  | 1744 |
| 22 | No | BALF | tNGS | 5 | 77 |  | 100 | Aspergillus flavus | 7 | 108 |  | 100 |
| 23 | No | BALF | tNGS | 4 | 46 |  | 100 | / |  |  |  |  |
| 24 | No | BALF | mNGS | 10700 | 31743.20636 | 14.68% |  | Candida albicans | 14 | 41.5331672 | 0.03% |  |
| Human gammaherpesvirus 4 | 2937 | 8713.065148 | 4.04% |  |
| 25 | No | BALF | tNGS | 6 | 95 |  | 100 | Stenotrophomonas maltophilia | 4 | 63 |  | 100 |
| Candida albicans | 2 | 32 |  | 100 |
| 26 | No | BALF | tNGS | 28 | 594 |  | 362 | Candida albicans | 2217 | 47071 |  | 28643 |
| 27 | Yes | BALF | tNGS | 22837 | 334526 |  | 34326 | Staphylococcus aureus | 51 | 747 |  | 100 |
| 28 | Yes | BALF | tNGS | 15510 | 204531 |  | 12976 | Haemophilus influenzae | 67 | 884 |  | 100 |
| Stenotrophomonas maltophilia | 6 | 79 |  | 100 |
| 29 | Yes | BALF | tNGS | 9 | 170 |  | 100 | Staphylococcus aureus | 40 | 754 |  | 100 |
| Stenotrophomonas maltophilia | 7 | 132 |  | 100 |
| Candida lusitaniae | 2105 | 39693 |  | 2918 |
| 30 | No | BALF | tNGS | 78497 | 1871514 |  | 10000 | Mycoplasma pneumoniae | 1223 | 29159 |  | <1000 |
| Human gammaherpesvirus 4 | 6118 | 145864 |  | 1000 |
| 31 | No | BALF | tNGS | 94 | 2294 |  | 569 | / |  |  |  |  |
| 32 | No | BALF | mNGS | 557 | 16465 | 39.56% |  | / |  |  |  |  |
| 33 | No | BALF | tNGS | 146 | 1392 |  | 290 | Moraxella catarrhalis | 433 | 4129 |  | 861 |
| Candida albicans | 28 | 267 |  | 100 |
| 34 | No | BALF | tNGS | 18 |  |  | 80 | Haemophilus influenzae | 135 |  |  | 600 |
| Candida albicans | 61 |  |  | 300 |
| Mycoplasma pneumoniae | 20 |  |  | 80 |
| 35 | No | BALF | mNGS | 301 |  |  |  | Influenza A virus | 53122 |  |  |  |
| 36 | Yes | BALF | mNGS | 303 | 15254 | 2.57% |  | / |  |  |  |  |
| 37 | No | BALF | tNGS | 1140 | 4493.34 | 1.88% |  | Candida albicans | 1351 | 5325 | 2.23% |  |
| Staphylococcus aureus | 190 | 748.89 | 0.31% |  |
| Mycoplasma pneumoniae | 32 | 126.13 | 0.06% |  |
| 38 | No | BALF | tNGS | 30482 | 60964 |  |  | Pseudomonas aeruginosa | 39 | 78 |  |  |
| Moraxella catarrhalis | 9 | 18 |  |  |
| Candida parapsilosis | 4 | 8 |  |  |
| Staphylococcus hominis | 57 | 114 |  |  |
| 39 | No | BALF | tNGS | 33 | 189.13 | 0.30% |  | Mycoplasma pneumoniae | 7 | 40.12 | 0.06% |  |
| 40 | Yes | BALF | mNGS | 171 | 218.8405037 | 0.09% |  | Human gammaherpesvirus 4 | 18207 | 23300.75468 | 8.34% |  |
| Human betaherpesvirus 5 | 671 | 858.725 | 0.31% |  |
| 41 | No | BALF | tNGS | 11 | 179 |  | 100 | Klebsiella pneumoniae | 228 | 3704 |  | 1471 |
| Candida albicans | 10224 | 166081 |  | 65961 |
| 42 | No | BALF | mNGS | 1 | 27 | <0.01% |  | Haemophilus influenzae | 49 | 1294 | 0.15% |  |
| 43 | No | BALF | tNGS | 57 | 788 |  | 100 | / |  |  |  |  |
| 44 | No | BALF | tNGS | 6 | 183 |  | 100 | / |  |  |  |  |
| 45 | No | BALF | mNGS | 5055 |  |  |  | / |  |  |  |  |
| 46 | No | BALF | mNGS | 181 |  |  |  | Mycoplasma pneumoniae | 1073 |  |  |  |
| 47 | No | BALF | tNGS | 33459 | 66918 |  |  | Acinetobacter baumannii | 26 | 52 |  |  |
| Human rhinovirus | 14 | 28 |  |  |
| 48 | No | BALF | mNGS | 11 | 628 | 3.24% |  | / |  |  |  |  |
| 49 | No | BALF | tNGS | 42667 | 1017261 |  | 100000 | Haemophilus influenzae | 323 | 7701 |  | <1000 |
| Klebsiella pneumoniae | 121 | 2885 |  | <1000 |
| Human gammaherpesvirus 4 | 1536 | 36621 |  | 1000 |
| 50 | No | BALF | tNGS | 52 | 702 |  | 100 | / |  |  |  |  |
| 51 | No | BALF | tNGS | 101 | 104.31 | 1.47% |  | / |  |  |  |  |
| 52 | No | BALF | tNGS | 3646 |  |  | 100 | Klebsiella pneumoniae | 8030 |  |  | 200 |

**Note:** “/” represent no related microorganism were identified.

**Supplementary Table 2**. A review of the literature pertaining to psittacosis cases in Zhejiang Province and the clinical characteristics of patients

| Ref. | No. of Patients | Age | Male (%) | Avian exposure (%) | Season of incidence | Symptoms | Elevated clinical indicators | Decreased clinical indicators | CT results | Treatment | Prognosis |
| --- | --- | --- | --- | --- | --- | --- | --- | --- | --- | --- | --- |
| 1 | 1 | 50 | 0% | 100% | Summer | Fever, cough, and shortness of breath | WBC, CRP, PCT | NA | Involvement of all lung lobes | Moxifloxacin | Improved |
| 2 | 3 | 45-53 | 100% | 100% | 2 in winter, 1 in autumn | cough | ALT, AST, CK, CRP | NA | 1 has solid exudative shadow in the left lower lung, 1 has multiple infections in both lungs, 1 has solid exudative shadow in the right lower lung | Levofloxacin, or Levofloxacin + Moxifloxacin, or Moxifloxacin + doxycycline | Improved |
| 3 | 1 | 72 | 100% | 100% | Autumn | Fever, cough, chest distress, short of breath | WBC, CRP, PCT | NA | Infection considered in the upper lobe of the right lung, small nodule in the lower lobe of the left lung; small pleural effusion on the right side | Doxycycline + imipenem cilastatin sodium, moxifloxacin + doxycycline | Improved |
| 4 | 4 | 55-68 | 50% | 100% | Autumn, winter | Fever, headache, fatigue, cough, chest tightness and shortness of breath | ALT | PO2, ALB | NA | NA | Improved |
| 5 | 1 | 56 | 100% | NA | Summer | Frigidity, chills, fever | CRP, PCT | PO2 | Infectious lesion in the lower lobe of the right lung | minocycline | Improved |
| 6 | 1 | 85 | 100% | NA | Spring | Fever | WBC, BNP, CREA | PLT, ALB | A little inflammation of the upper lobe of the right lung, and a small amount of fluid in both thoracic and pericardial cavities | Moxifloxacin | Improved |
| 7 | 1 | 54 | 0% | 100% | Winter | Fever, cough | WBC, NEUT, PCT, ALT, AST | ALB | solid changes in both lungs | Moxifloxacin + Doxycycline | Improved |
| 8 | 13 | 33-78 | 53.8% | 38.5% | NA | Fever, cough, shortness of breath, headache, muscle pains | NEUT, CRP, PCT | NA | bronchial insufflation sign | tetracycline | 15.4% died |
| 9 | 5 | 57-71 | 60% | 80% | NA | High fever, cough, shortness of breath, chills, nausea, vomiting, malaise | NEUT, CRP, PCT, lacLDH, CK, CK-MB | NA | bronchial insufflation sign | Moxifloxacin, or Moxifloxacin + tigecycline | Recovered |
| 10 | 1 | 52 | 100% | 100% | Winter | Fever, drowsiness, dizziness, impaired consciousness | CRP, PCT, LDH, ALT, AST | WBC, PLT | Infectious lesion of the upper lobe of the left lung | Moxifloxacin + Doxycycline | Improved |
| 11 | 4 | 51-85 | 50% | 25% | NA | Cough, sputum, chest tightness, shortness of breath, fever, dyspnoea, muscle pains, weakness, chills, nausea and vomiting | NE%, PCT, CRP, ALT, AST，LDH | LY%, K, ALB | bronchial insufflation sign | Tigecycline + doxycycline + ticlopidine + moxifloxacin; tigecycline + cefoperazone sulphadoxine; cefoperazone sulbactam + azithromycin; piperacillin tazobactam + metronidazole +  Azithromycin + doxycycline | Improved |
| 12 | 1 | 44 | 0% | 100% | winter | Cough, chest pain, fever, unconscious | NEUT, CRP, PCT, D-dimer, ALT, AST, CREA | ALB | Solid lesion in the right lung, bronchial insufflation sign | Tigecycline + levofloxacin + imipenem cilastatin sodium | Improved |
| 13 | 39 | 47-82 | 53.8% | 84.6% | NA | Fever, cough, shortness of breath, weakness, dizziness, headache, nausea, vomiting, diarrhoea | NA | NA | Multilobar infiltration, solid changes, bronchial congestion sign, ground glass shadow, pleural effusion | Moxifloxacin, Azithromycin, Minocycline | 5.1% died |
| 14 | 1 | 65 | 0% | 100% | Spring | Fever, abdominal pain, vomiting, cough, sputum | WBC, NEUT, CRP, PCT, ALT, AST, CK, LDH | PLT, K | Solid lesion in the lower lobe of the right lung, pleural fluid | Levofloxacin + doxycycline | Improved |
| 15 | 32 | 59-77 | 53.1% | 84.4% | NA | Fever, cough, weakness, diarrhoea | ALT, AST, LDH, CK, BNP, PCT, CRP | ALB | The moderate group was dominated by single lobe involvement, while the severe group was  dominated by multi lobe involvement and pleural effusion | Moxifloxacin, Doxycycline, Meropenem + Moxifloxacin, Piperacillin Tazobactam + Moxifloxacin, Sulpresan + Moxifloxacin, Cefoperazone Sulbactam + Doxycycline | Improved |
| 16 | 2 | 64-76 | 0% | 50% | Autumn, winter | Cough, shortness of breath, fever, chills, unconsciousness | WBC, NEUT | NA | Bilateral lobar lesions | Moxifloxacin | Improved |
| 17 | 1 | 64 | 100% | 100% | Summer | Fever, cough | NA | NA | Left lung infection, pleural fluid | Doxycycline | Improved |
| 18 | 32 | 45-84 | 62.5% | 100% | NA | Fever, headache, myalgia, cough | WBC, NE%, CRP, PCT, BUN, ALT, AST | NA | Bilateral or unilateral lung infiltration | Doxycycline, moxifloxacin + doxycycline | Improved |
| 19 | 1 | 56 | 100% | 0% | Summer | Fever, Frigidity, chills | NE%, CRP, ESR, ferritin | NA | Solid lesion in the lower lobe of the left lung, bronchial insufflation sign | Moxifloxacin | Improved |
| 20 | 4 | 48-56 | 50% | 50% | Autumn, winter | Fever, headache, weakness, chills, cough | NE%, CRP | NA | Bilobar or unilobar lesions | Doxycycline | Improved |
| 21 | 4 | 51-73 | 100% | 0% | NA | High fever, cough, sputum, dyspnoea, unconsciousness | WBC, CRP, NE%, PCT | LY% | Multiple hyperdense exudative shadows and solid shadows in both lobes | Doxycycline, doxycycline + moxifloxacin, doxycycline + levofloxacin | Improved |
| 22 | 1 | 65 | 100% | 0% | NA | Fever, shortness of breath, cough, chest tightness, dizziness, headache, consciousness | WBC, CRP, PCT, ALT, AST, CREA, BUN, BNP | LY% | Exudative lesions in both lungs | Meropenem + Moxifloxacin | Improved |
| 23 | 15 | 41-77 | 46.7% | 100% | NA | Fever | CRP, NEUT | NA | Large lobed solid shadows, pleural effusion, ground glass shadows, inflated bronchial sign, fine grid sign, halo sign | NA | 6.7% died |
| 24 | 1 | 67 | 100% | 100% | Spring | Fever, cough and sputum, chest tightness and shortness of breath | WBC, CRP, CK, LDH | NA | Solid left lung with scattered exudates in both lungs and pleural effusions on both sides | Tigecycline + Moxifloxacin | Improved |
| 25 | 1 | 64 | 100% | 100% | Spring | Fever, chills, headache | NE%, CRP, LDH, CK, PCT, ESR | LY% | Inflammation of upper lobe of right lung | Omadacycline, minocycline | Improved |
| 26 | 1 | 65 | 100% | 100% | Spring | Fever, cough, sputum | NA | NA | bilateral lung lesions | Moxifloxacin + Azithromycin | Improved |
| 27 | 6 | 51-69 | 66.7% | 66.7% | NA | Fever, cough, headache, chills | CRP, PCT, ESR, LDH | NA | Unilateral or bilateral lung lesions, solid lesions, bronchial congestion sign, pleural fluid | Doxycycline | Improved |
| 28 | 1 | 60 | 0% | 100% | Winter | Fever, weakness, chills, cough | WBC, NEUT, ALT, AST, CK, Ferritin, ESR | NA | Solid lesion in the lower lobe of the right lung | Doxycycline | Improved |

**Notes:** “NA” Indicates that the corresponding data could not be obtained.

**Abbreviations:** WBC, white blood cell; NEUT, neutrophil count; CRP, c-reactive protein; PCT, procalcitonin; ALT, alanine aminotransferase; AST, aspartate aminotransferase; CK, creatinine kinase; CK-MB, creatinine kinase-MB; ALB, albumin; PO2, Partial pressure of oxygen; CREA, creatinine; BNP, B-type natriuretic peptide; PLT, platelet; LDH, lactate dehydrogenase; BUN, blood urea nitrogen; NE%, Neutrophil percentage; LY%, Lymphocyte percentage; ESR, Erythrocyte Sedimentation rate; K, potassium.

**Supplementary Table 3**. General characteristics of the studies in the meta-analysis.

| References | Setting | Design | Diagnostic test | Study group | Number of samples | Clinical difference analysis | Risk factor analysis |
| --- | --- | --- | --- | --- | --- | --- | --- |
| Shi et al., 2024 29 | China | Cohort study | mNGS | Mean age 62.04 ± 11.32 years | 9 severe, 18 non-severe | Yes | Yes |
| Yuan et al., 2024 30 | China | Cohort study | mNGS | Age range 20-86 years old | 27 severe, 19 non-severe | Yes | Yes |
| Liu et al., 2024 31 | China | Multi-center study | mNGS | Median (IQR) age: 64.5 (55.7, 74.0) years | 39 severe, 35 non-severe | Yes | No |
| Gao et al., 2023 32 | China | Cohort study | mNGS, PCR | Age range 31-87 years old | 16 severe, 39 non-severe | Yes | Yes |
| Chu et al., 2023 33 | China | Cohort study | mNGS | Age range 25-81 years old | 7-severe, 15 non-severe | Yes | No |
| Ni et al., 2023 34 | China | Multi-center study | mNGS | Median (IQR) age: 61 (53.0, 68.0) years | 52 severe, 70 non-severe | Yes | Yes |
| Yang et al., 2022 35 | China | Multi-center study | mNGS | Age range 26-82 years old | 53 severe, 63 non-severe | Yes | Yes |
| Liang et al., 2022 36 | China | Cohort study | mNGS, PCR | Age range 38-71 years old | 23 severe, 7-non severe | Yes | No |
| Xu et al., 2022 37 | China | Cohort study | mNGS | Age range 30-88 years old | 20 severe, 15 non-severe | Yes | No |
| Su et al., 2021 38 | China | Cohort study | mNGS | Age range 47-82 years old | 15 severe, 12 non-severe | Yes | Yes |
| This study | China | Cohort study | mNGS, tNGS | Age range 33-80 years old | 8 severe, 44 non-severe | Yes | No |

Abbreviation: IQR, interquartile range.

**Reference**

1. Zhu R, Luo R, Wang X. A case of severe community-acquired pneumonia due to Chlamydia psittaciosis. *Chinese Journal of Tuberculosis and Respiratory Diseases*. 2019;42(7):548-551. doi:10.3760/cma.j.issn.1001-0939.2019.07.021

2. Qiu C, Ye J. Chlamydia psittaci pneumonia diagnosed with the aid of second-generation sequencing: Report of three cases and literature review. *Zhejiang Medicine*. 2021;43(18):2030-2033. doi:10.12056/j.issn.1006-2785.2021.43.18.2020-4166

3. Tong W, Li N, Fang Q. Diagnosis of Chlamydia psittaci pneumonia by second-generation sequencing technique: case report and literature review. *YIYAO QIANYAN*. 2021;11(26):192-193.

4. Lu Z, Tao T. Nursing care of four cases of Chlamydia psittaci pneumonia. *Journal of Nursing and Rehabilitation*. 2021;20(4):44-45. doi:10.3969/j.issn.1671‐9875.2021.04.011

5. Wang X, Lin Y, Yu C, Gao C. Care of patients with severe Chlamydia psittaci pneumonia combined with Parkinson's disease. *Journal of Nursing and Rehabilitation*. 2021;20(8):44-47. doi:10.3969/j.issn.1671-9875.2021.04.011

6. Xu L, huang Y, Zhong C. Nursing care of a case of Stevens-Johnson syndrome combined with Chlamydia psittaci infection in an elderly hypertensive patient. *Journal of Nursing and Rehabilitation*. 2022;21(9):82-83. doi:10.3969/j.issn.1671-9875.2022.09.022

7. Wang Y, Fu Z, Peng W. Severe pneumonia with Chlamydia psittaci: case report and literature review. *Chinese Journal of Rural Medicine and Pharmacy*. 2021;28(7):57-58.

8. Wu HH, Feng LF, SY F. Application of metagenomic next-generation sequencing in the diagnosis of severe pneumonia caused by Chlamydia psittaci. *BMC Pulmonary Medicine*. 2021;21(1):300. doi:10.1186/s12890-021-01673-6

9. Kong C-Y, Zhu J, Lu J-J, Xu Z-H. Clinical characteristics of Chlamydia psittaci pneumonia. *Chinese Medical Journal*. 2021;134(3):353-355. doi:10.1097/cm9.0000000000001313

10. Zhou H, Zhang B, Kong L. A case of severe Chlamydia psittaci pneumonia diagnosed by metagenomic next-generation sequencing. *Chinese Journal of General Practitioners*. 2022;21(12):1178-1180 doi:10.3760/cma.j.cn114798-20220616-00662

11. Guo F, Xu C, Wang J, Yang Y, Zhu R. The value of metagenomic high-throughput sequencing in the auxiliary diagnosis of pneumonia caused by Chlamydia psittaci. *Chinese Journal of Health Laboratory Technology*. 2022;32(21):2594-2602

12. Qian Y, Yu Z. A case of severe pneumonia of Chlamydia psittaci applying rapid diagnosis by second-generation sequencing of the macro-genome and extracorporeal membrane lung oxygenation for the treatment of Chlamydia psittaci fever. *Zhejiang Journal of Integrated Traditional Chinese and Western Medicine*. 2022;32(3):258-260.

13. Su S, Zhou Y, Ye Y, et al. Chest CT imaging characterisation of Chlamydia psittaci pneumonia. *Zhejiang Medicine*. 2022;44(6):657-660. doi:10.12056/j.issn.1006-2785.2022.44.6.2021-2195

14. Pan B, Ye J. A case of severe Chlamydia psittaci pneumonia with abdominal pain and vomiting as the first presentation. *Chinese Journal of Rural Medicine and Pharmacy*. 2022;29(15):55-56.

15. Hu L, Zheng Y, Cao J, Lin L, Li Y, Wu H. Clinical analysis of elderly patients with Chlamydia psittaci pneumonia. *Chinese Journal of General Practitioners*. 2022;21(8):737-742 doi:10.3760/cma.j.cn114798-20220111-00029

16. Liu S, Yang Y, Pang Z, et al. A cluster of two psittacosis cases among women farmers exposed to Chlamydia psittaci‐infected domestic poultry in Zhejiang Province, China. *Zoonoses and Public Health*. 2022;70(1):93-102. doi:10.1111/zph.13004

17. Wang J, Zhu Y, Mo Q, Yang Y. Case Report: A Chlamydia psittaci pulmonary infection presenting with migratory infiltrates. *Frontiers in Public Health*. 2022;10:1028989. doi:10.3389/fpubh.2022.1028989

18. Yin Q, Li Y, Pan H, et al. Atypical pneumonia caused by Chlamydia psittaci during the COVID-19 pandemic. *International Journal of Infectious Diseases*. 2022;122:622-627. doi:10.1016/j.ijid.2022.07.027

19. Gao Y, Zhang X, Liu J, Gong L, Chen G, Zhou X. Chlamydia psittaci pneumonia complicated with organizing pneumonia: A case report and literature review. *IDCases*. 2022;30:e01584. doi:10.1016/j.idcr.2022.e01584

20. Qin X-C, Huang J, Yang Z, et al. Severe community-acquired pneumonia caused by Chlamydia psittaci genotype E/B strain circulating among geese in Lishui city, Zhejiang province, China. *Emerging Microbes & Infections*. 2022;11(1):2715-2723. doi:10.1080/22221751.2022.2140606

21. Song Z, Hang Q. Severe Chlamydia psittaci pneumonia: report of four cases and literature review. *Zhejiang Journal of Integrated Traditional Chinese and Western Medicine*. 2023;33(4):340-341.

22. Xu D, Qian A. A case of severe psittacosis pneumonia with multi organ insufficiency and meningitis. *Chinese Journal of Emergency Medicine*. 2023;32(1):109-112. doi:10.3760/cma.j.issn.1671-0282.2023.01.020

23. Liu C, Zhong Y, Chen J, et al. Clinical and CT imaging features of Chlamydia psittaci pneumonia. *Chinese Journal of Radiology*. 2023;57(3):315-318. doi:10.3760/cma.j.cn112149-20220302-00187

24. Gu R, Cao L, Xuan N, et al. Treatment of severe pneumonia in Chlamydia psittaci combined with Aspergillus terreus. *Chinese Journal of Emergency Medicine*. 2023;32(4):518-520. doi:10.3760/cma.j.issn.1671-0282.2023.04.013

25. Chen W, Chen Y. A case of Chlamydia psittaci pneumonia treated with omadacycline. *Chinese Modern Doctor*. 2023;61(18):140-142. doi:10.3969/j.issn.1673-9701.2023.18.034

26. Yao W, Yang X, Shi J, et al. Case Report: A case of Chlamydia psittaci infection in an HIV patient. *Frontiers in Cellular and Infection Microbiology*. 2023;13:1185803. doi:10.3389/fcimb.2023.1185803

27. Dai J, Lian X, Mo J, et al. Case report: A clinical case study of six patients with Chlamydia psittaci pneumonia. *Frontiers in Cellular and Infection Microbiology*. 2023;13:1084882. doi:10.3389/fcimb.2023.1084882

28. Yang X, Liu Z, Liu X, et al. Chlamydia Psittaci Pneumonia-Induced Myocarditis: A Case Report. *Infection and Drug Resistance*. 2023;Volume 16:4259-4264. doi:10.2147/idr.S417241

29. Shi T, Yu Y, Shen Y, et al. Serum C-reactive protein to albumin ratio as a potential risk indicator of pneumonia caused by Chlamydia psittaci: a multicenter retrospective study. *Frontiers in Cellular and Infection Microbiology*. 2024;14:1371625. doi:10.3389/fcimb.2024.1371625

30. Yuan L, Chen Q, Zhu XY, Lai LM, Zhao R, Liu Y. Evaluation of clinical characteristics and risk factors associated with Chlamydia psittaci infection based on metagenomic next-generation sequencing. *BMC Microbiology*. 2024;24(1):86. doi:10.1186/s12866-024-03236-1

31. Liu K, Wu L, Chen G, et al. Clinical Characteristics of Chlamydia psittaci Infection Diagnosed by Metagenomic Next-Generation Sequencing: A Retrospective Multi-Center Study in Fujian, China. *Infection and Drug Resistance*. 2024;17:697-708. doi:10.2147/idr.S443953

32. Gao Y, Wu Y, Xu D, et al. Chlamydia psittaci pneumonia in Wuxi, China: retrospective analysis of 55 cases and predictors of severe disease. *Frontiers in Medicine*. 2023;10:1150746. doi:10.3389/fmed.2023.1150746

33. Chu W, Jia J, Huang L, et al. Clinical Characteristics Treatment and Prognosis of Twenty-two Patients with Chlamydia psittaci pneumonia  Diagnosed by Metagenomic Next-Generation Sequencing. 2023;doi:10.21203/rs.3.rs-3421316/v1

34. Ni Y, Zhong H, Gu Y, et al. Clinical Features, Treatment, and Outcome of Psittacosis Pneumonia: A Multicenter Study. *Open Forum Infectious Diseases*. 2023;10(2):ofac518. doi:10.1093/ofid/ofac518

35. Yang M, Yang DH, Yang H, et al. Clinical Characteristics of Chlamydia psittaci Pneumonia Infection in Central South China. *Infect Dis Ther*. 2022;11(4):1631-1647. doi:10.1007/s40121-022-00662-4

36. Liang Y, Dong T, Li M, et al. Clinical diagnosis and etiology of patients with Chlamydia psittaci pneumonia based on metagenomic next-generation sequencing. *Front Cell Infect Microbiol*. 2022;12:1006117. doi:10.3389/fcimb.2022.1006117

37. Xu L, Zhao Z, Mai H, Tan X, Du Y, Fang C. Clinical and chest computed tomography features associated with severe Chlamydia psittaci pneumonia diagnosed by metagenomic next-generation sequencing: A multicenter, retrospective, observational study. *Medicine*. 2022;101(50):e32117. doi:10.1097/md.0000000000032117

38. Su S, Su X, Zhou L, et al. Severe Chlamydia psittaci pneumonia: clinical characteristics and risk factors. *Annals of Palliative Medicine*. 2021;10(7):8051-8060. doi:10.21037/apm-21-1502
